# Supplementary material
Source: ML conference proceedings conference paper supplement (https://openreview.net/forum?id=OX4yll3X53)

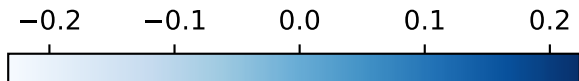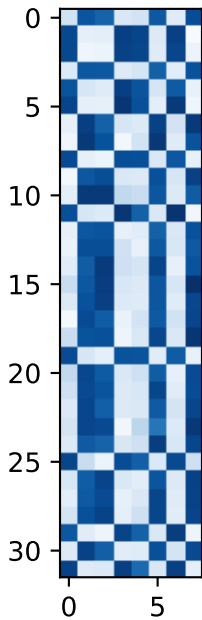

Supplement: supplementary_material [file attachment]

-0.15 -0.10 -0.05 0.00 0.05 0.10 0.15

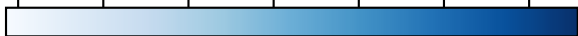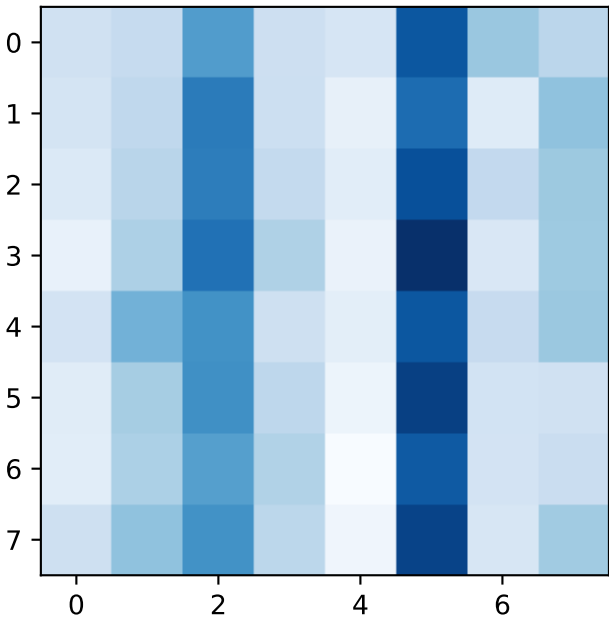

Supplement: supplementary_material [file attachment]

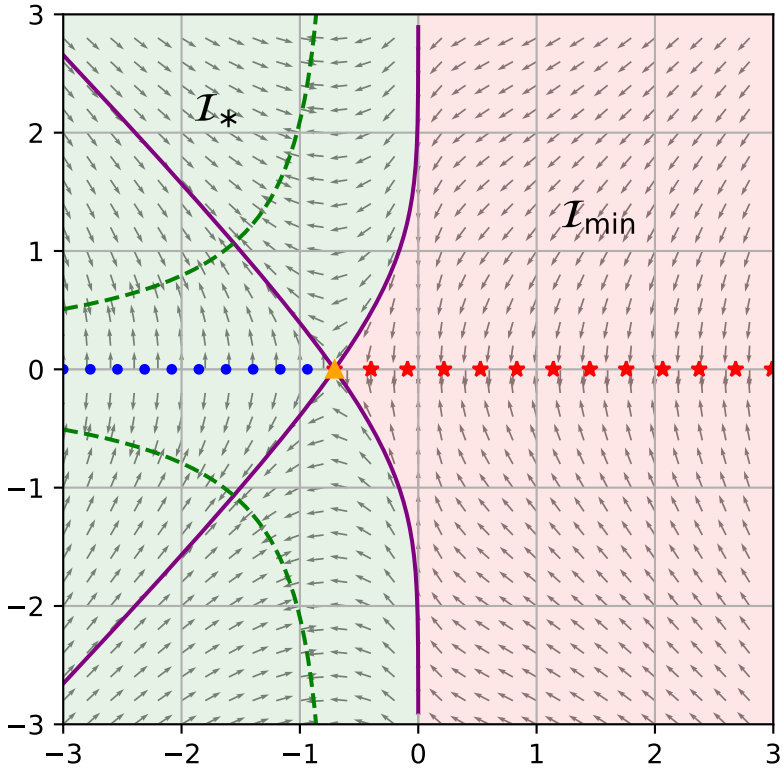

Supplement: supplementary_material [file attachment]

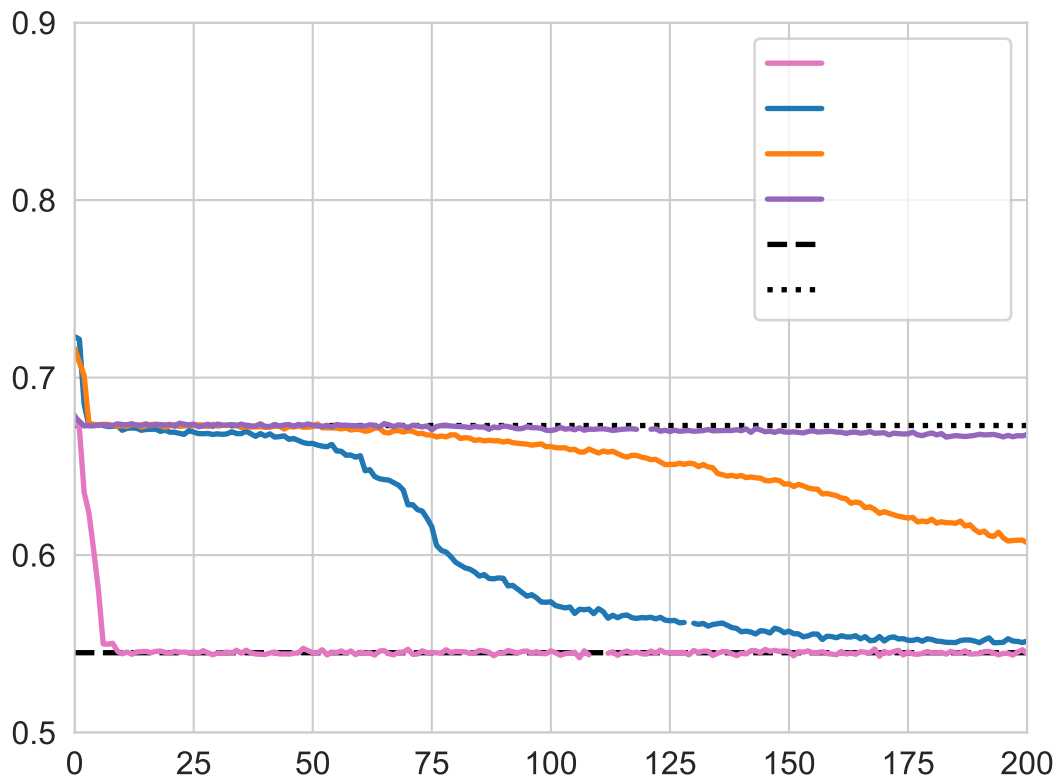

Supplement: supplementary_material [file attachment]

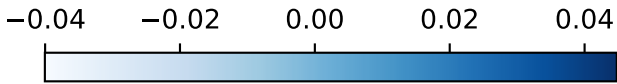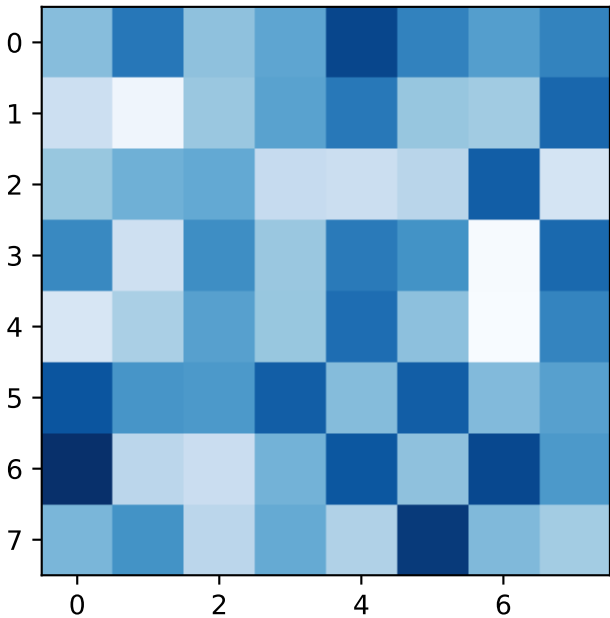

Supplement: supplementary_material [file attachment]

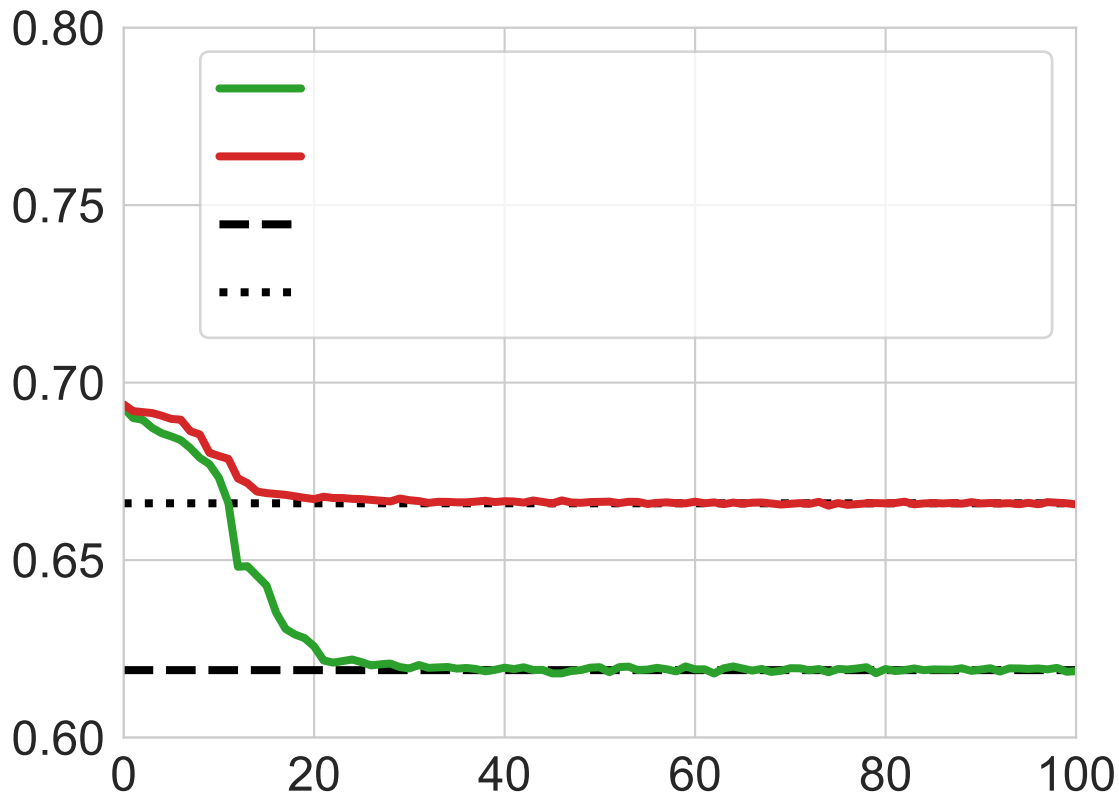

Supplement: supplementary_material [file attachment]

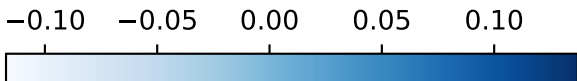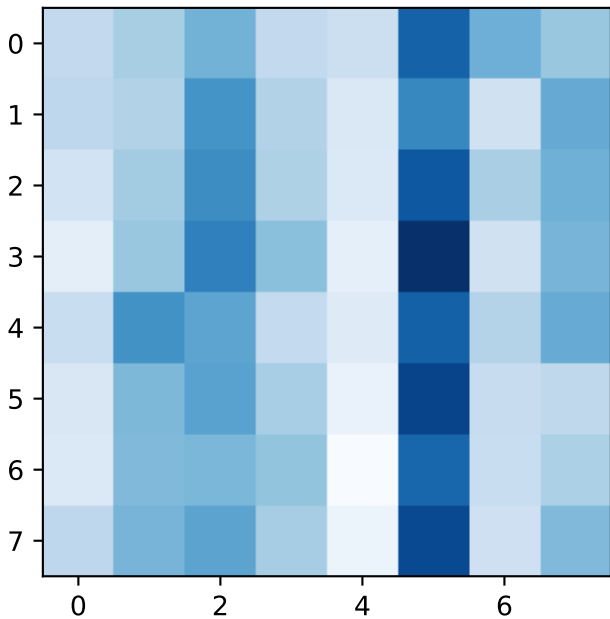

Supplement: supplementary_material [file attachment]

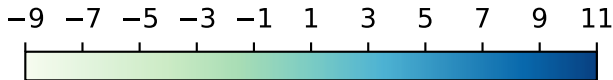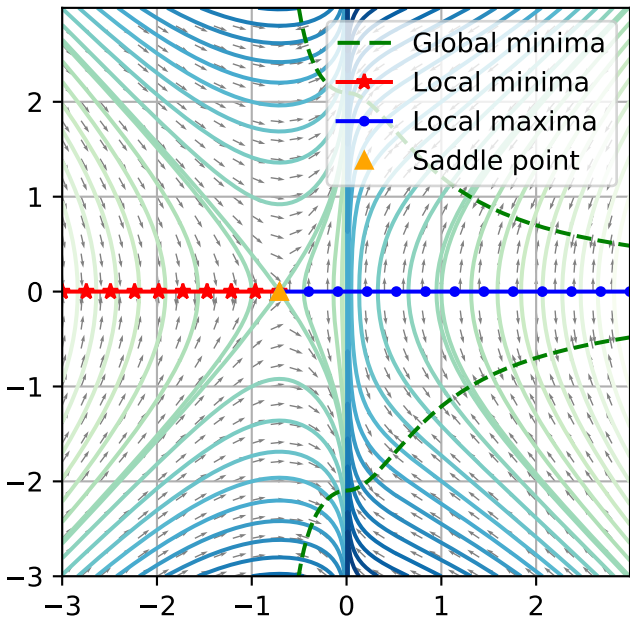

Supplement: supplementary_material [file attachment]

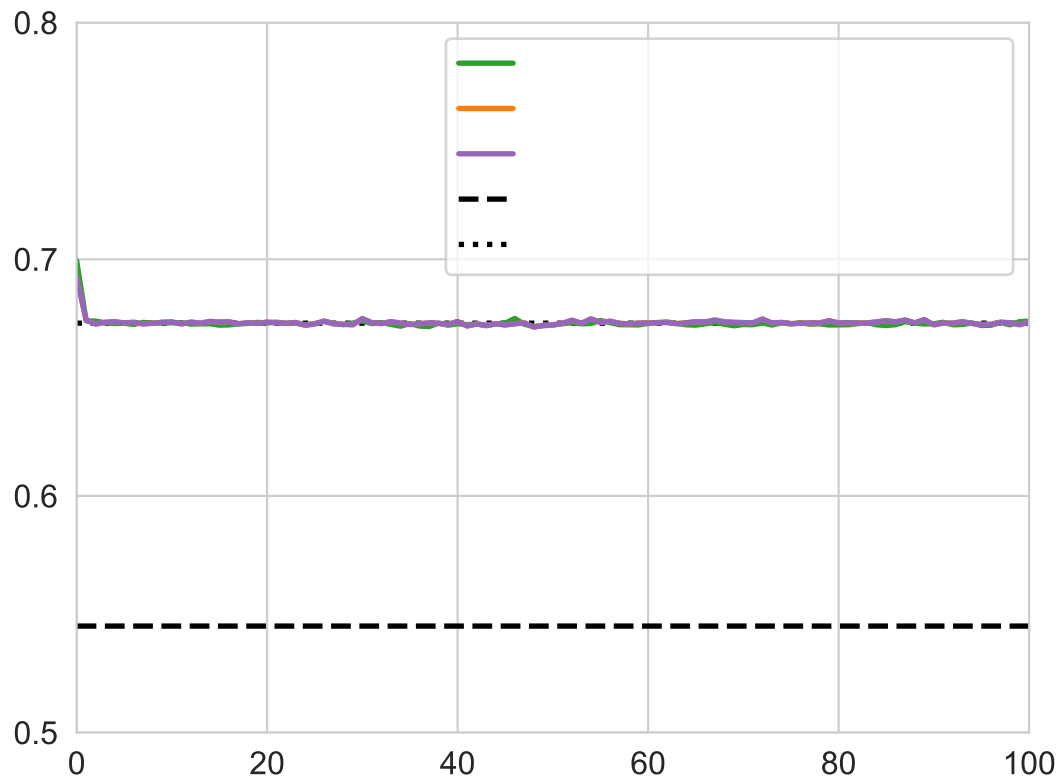

Supplement: supplementary_material [file attachment]

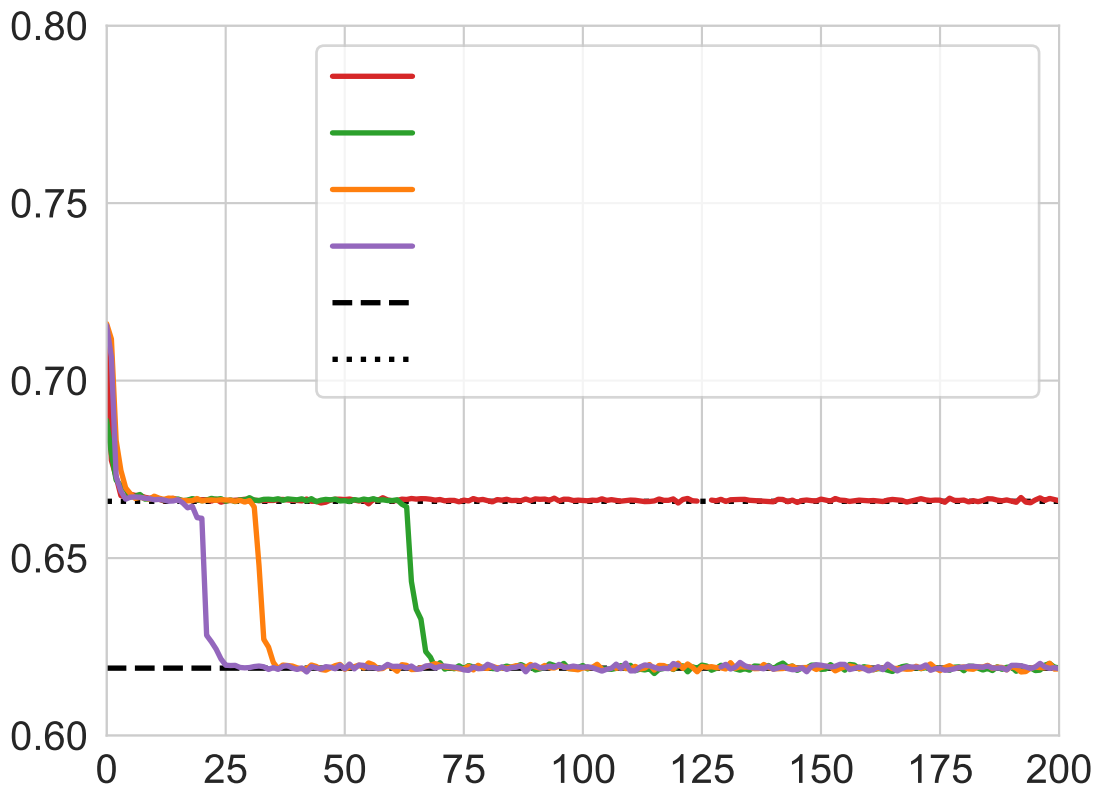

Supplement: supplementary_material [file attachment]

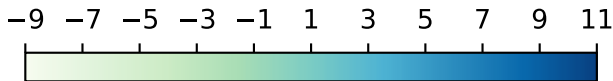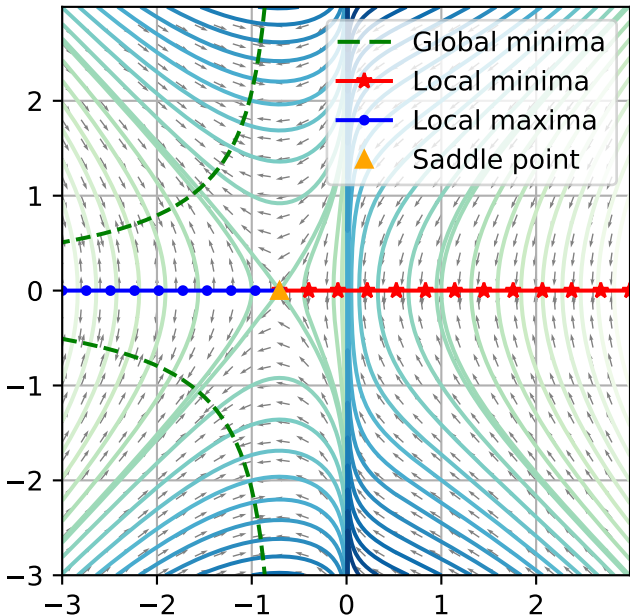

Supplement: supplementary_material [file attachment]

-0.02

0.00

0.02

0.04

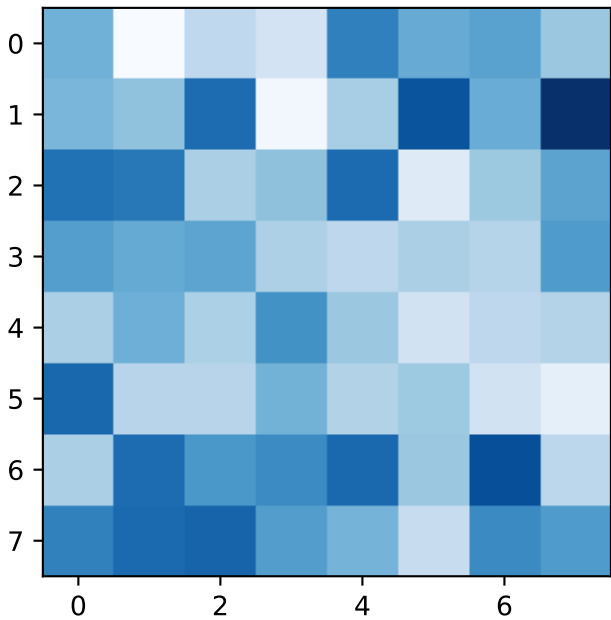

Supplement: supplementary_material [file attachment]

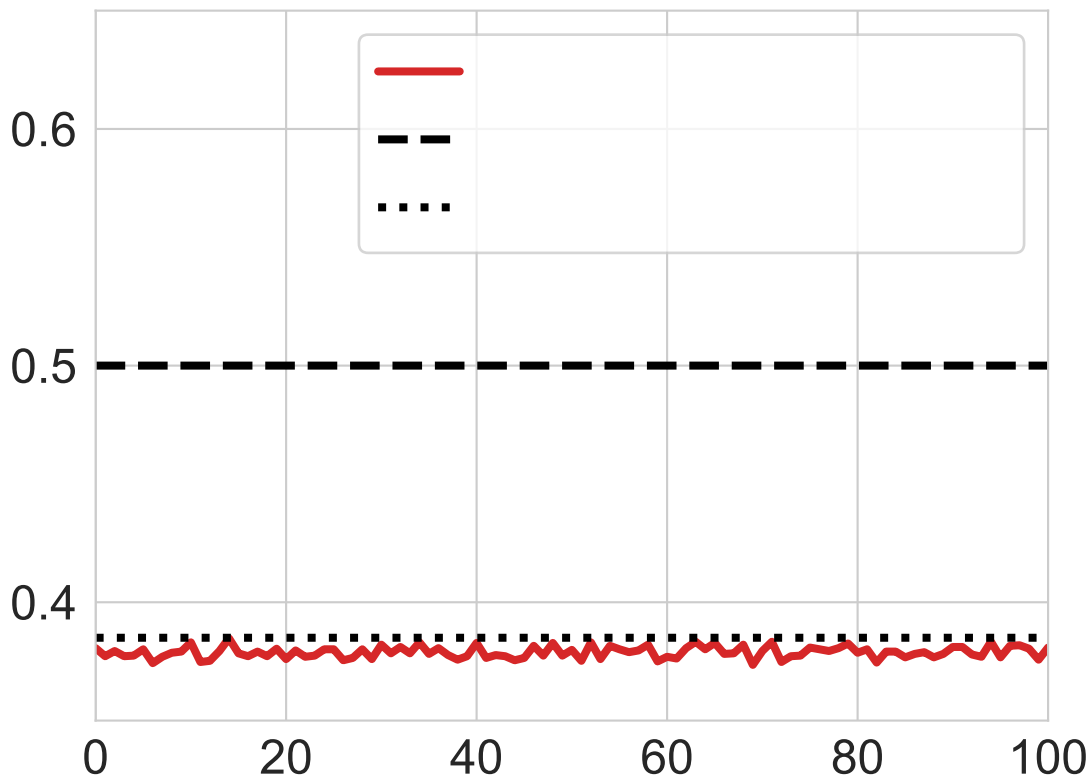

Supplement: supplementary_material [file attachment]

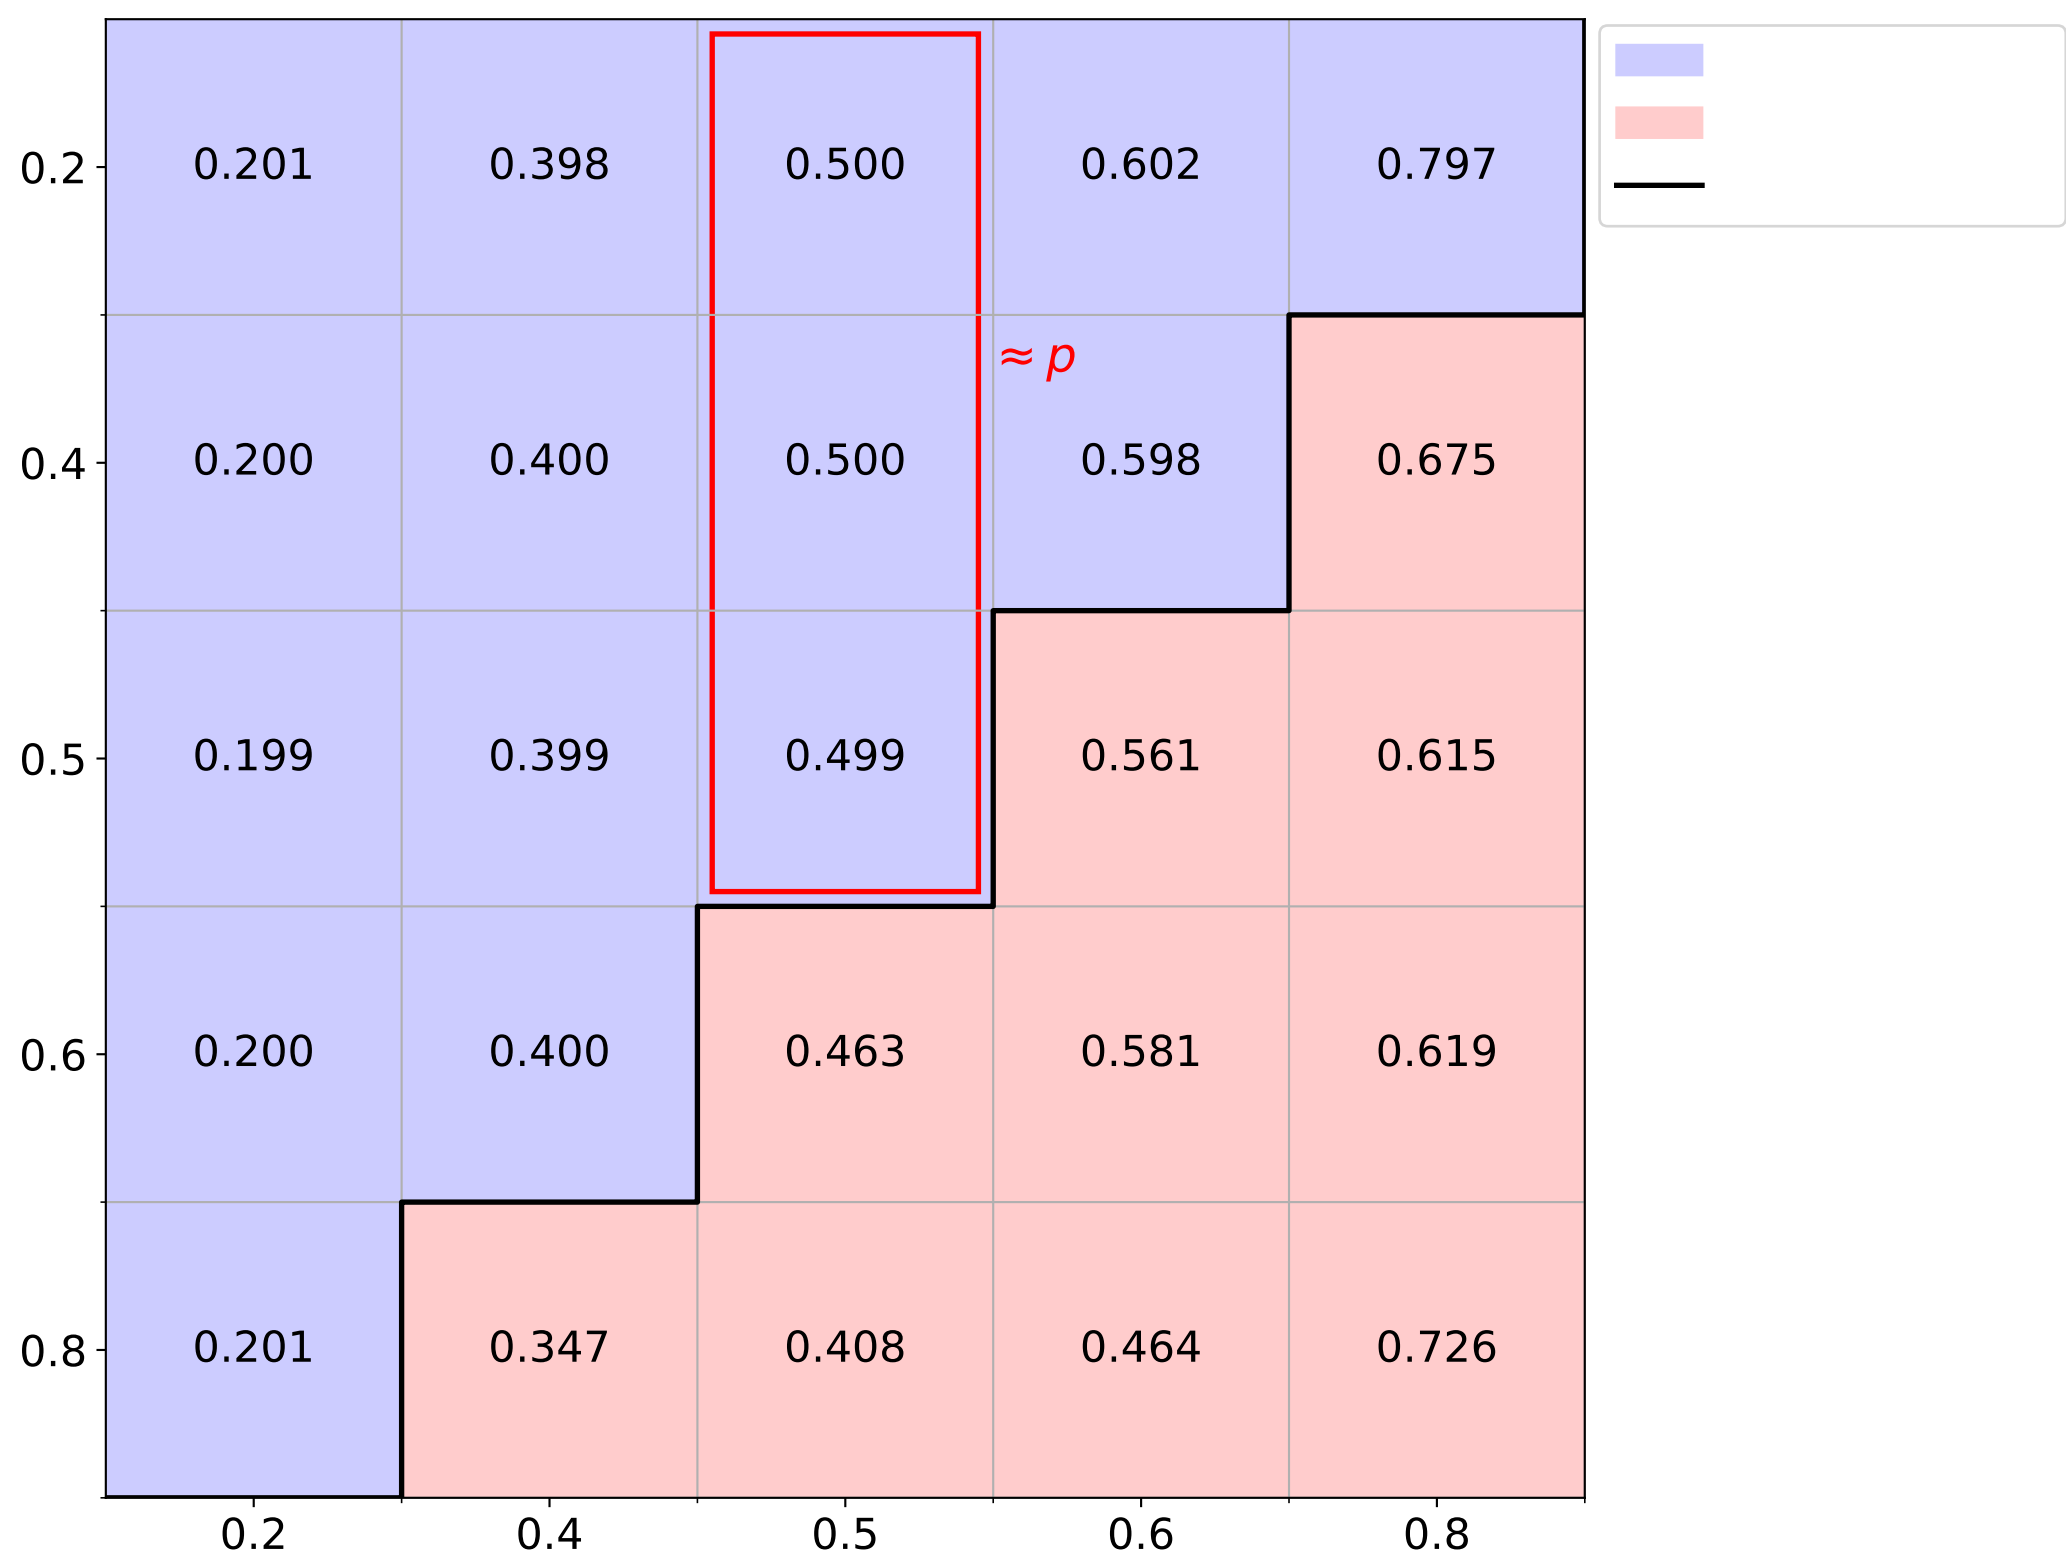

Supplement: supplementary_material [file attachment]

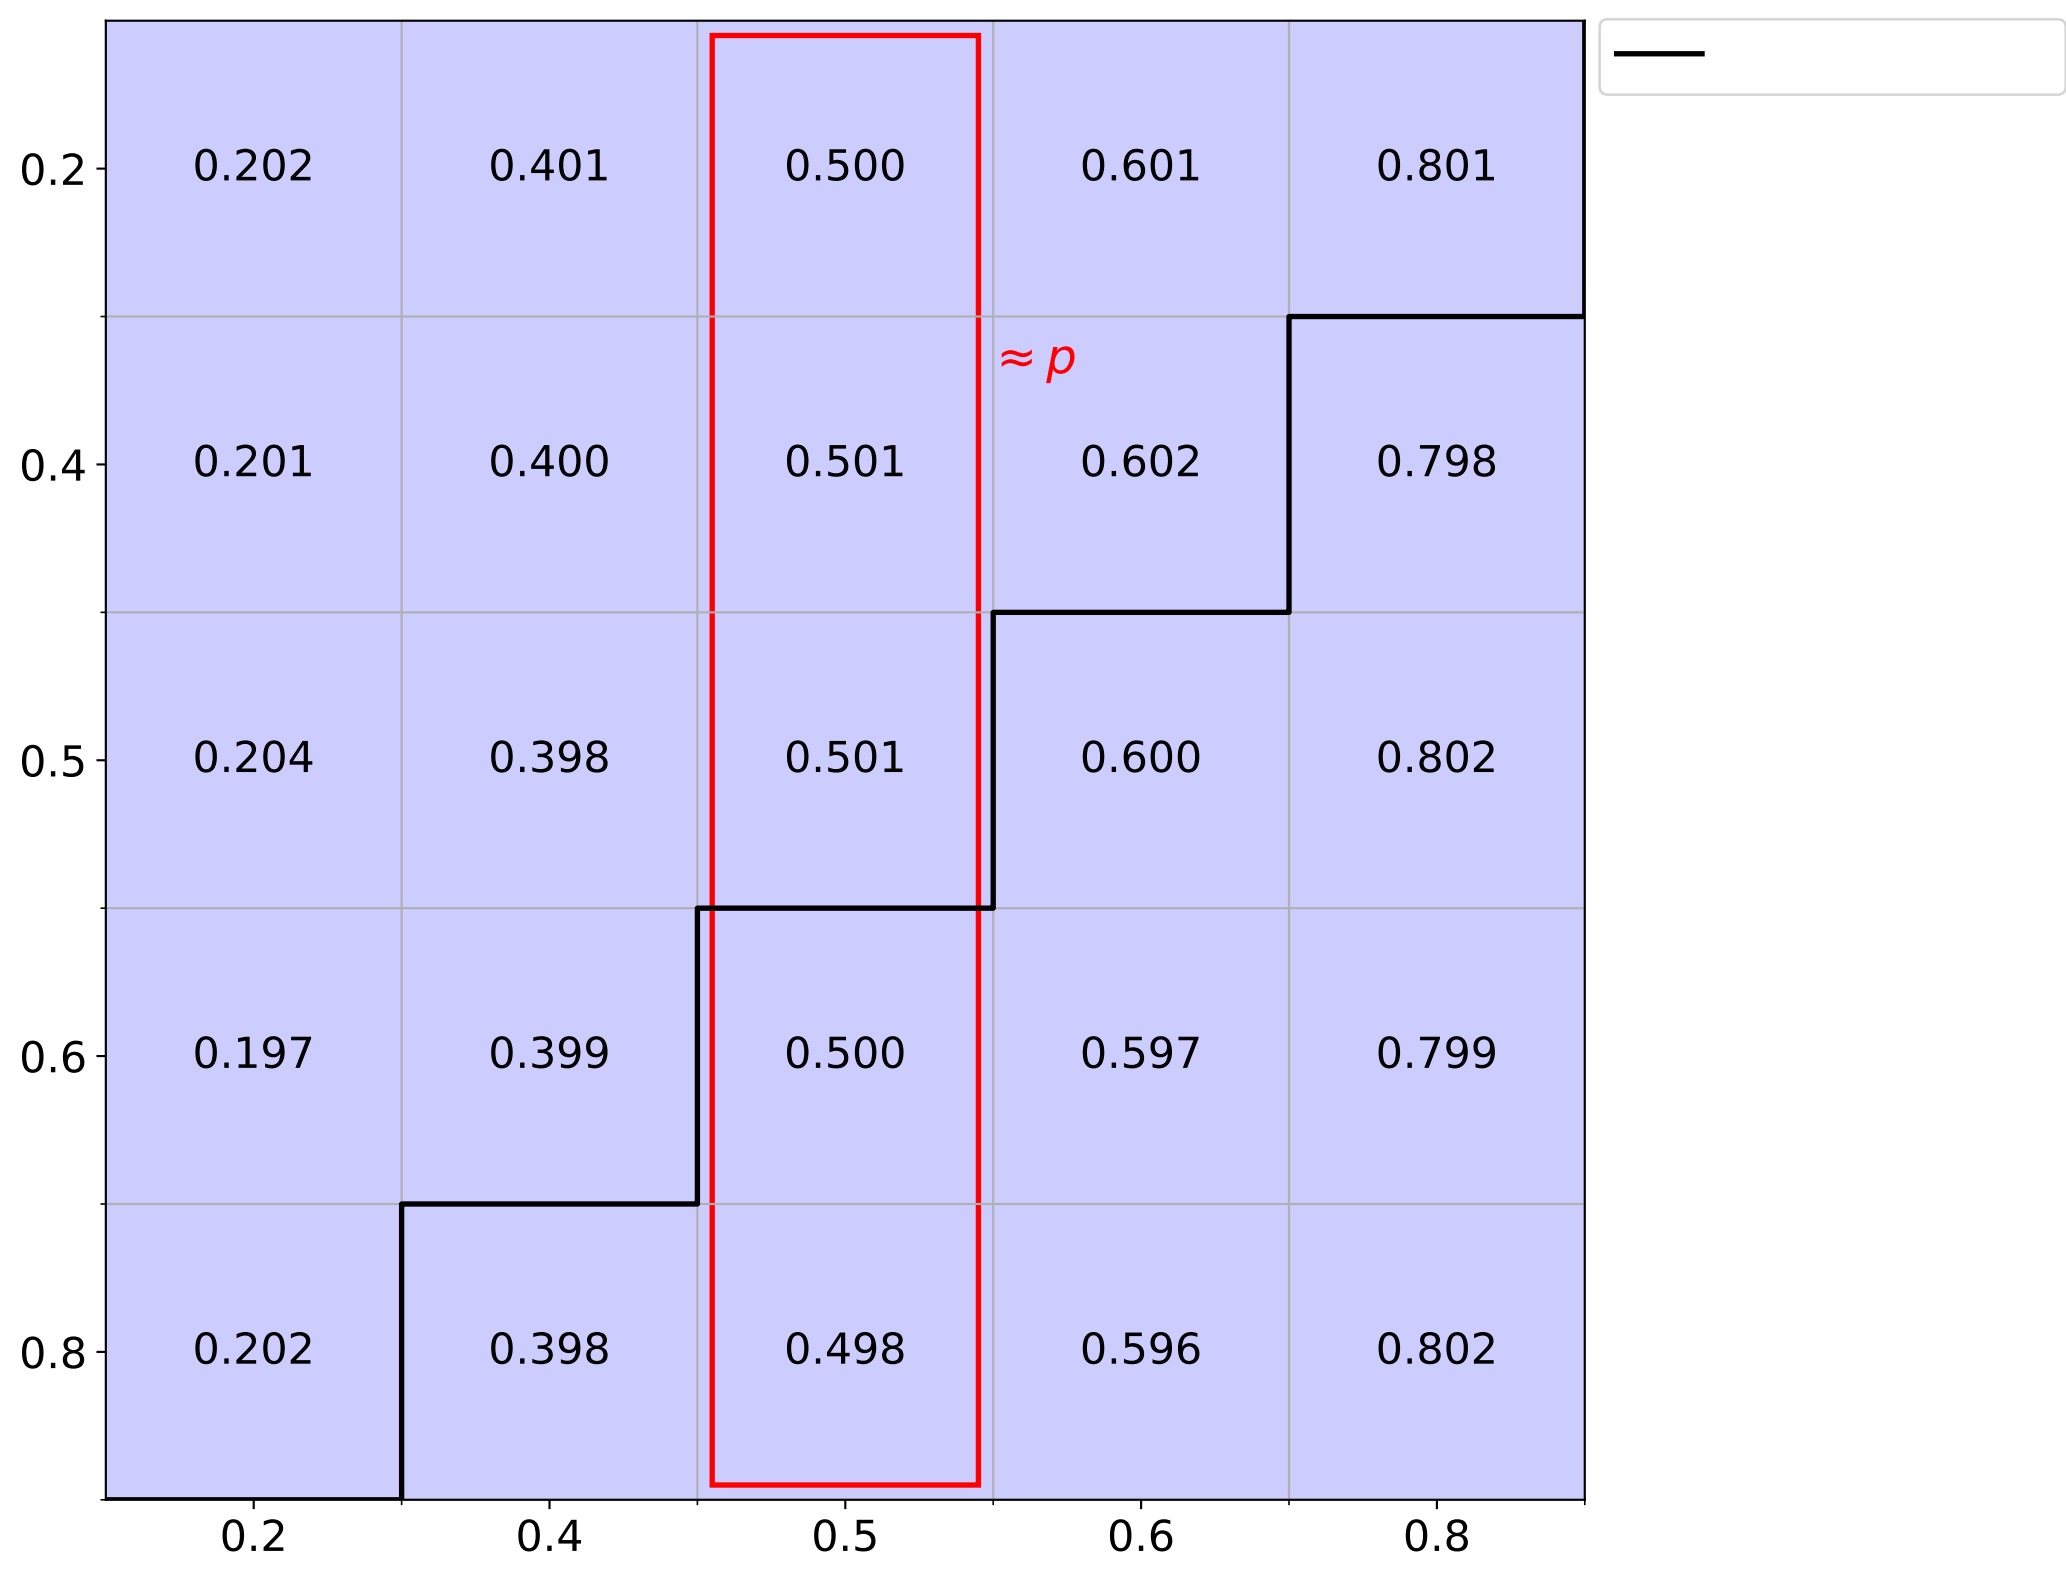

Supplement: supplementary_material [file attachment]

-0.10

-0.05

0.00

0.05

0.10

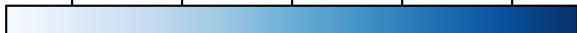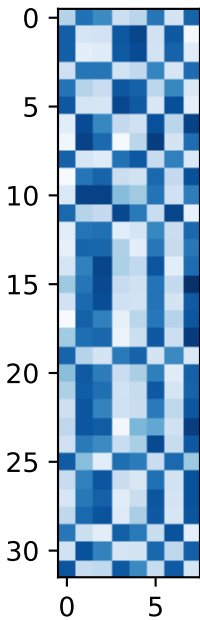

Supplement: supplementary_material [file attachment]

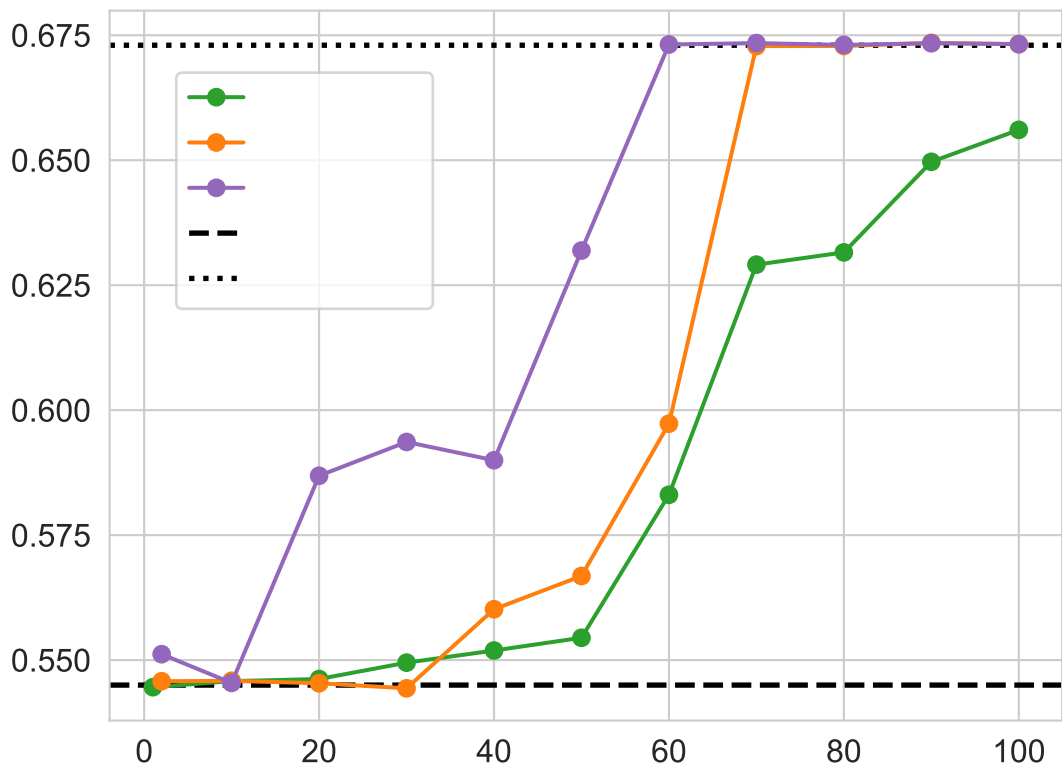

Supplement: supplementary_material [file attachment]

-0.04   -0.02   0.00   0.02   0.04

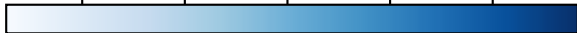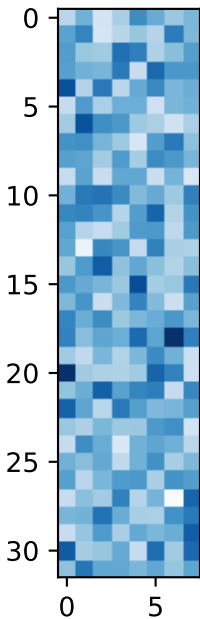

Supplement: supplementary_material [file attachment]

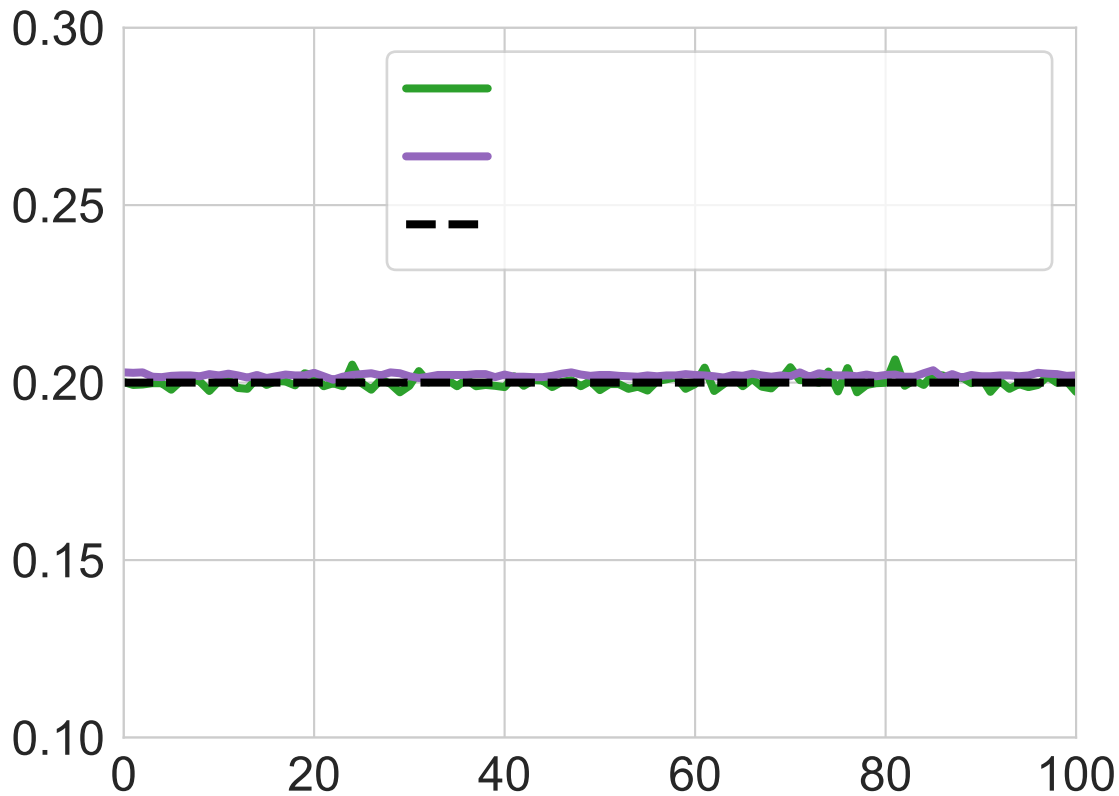

Supplement: supplementary_material [file attachment]

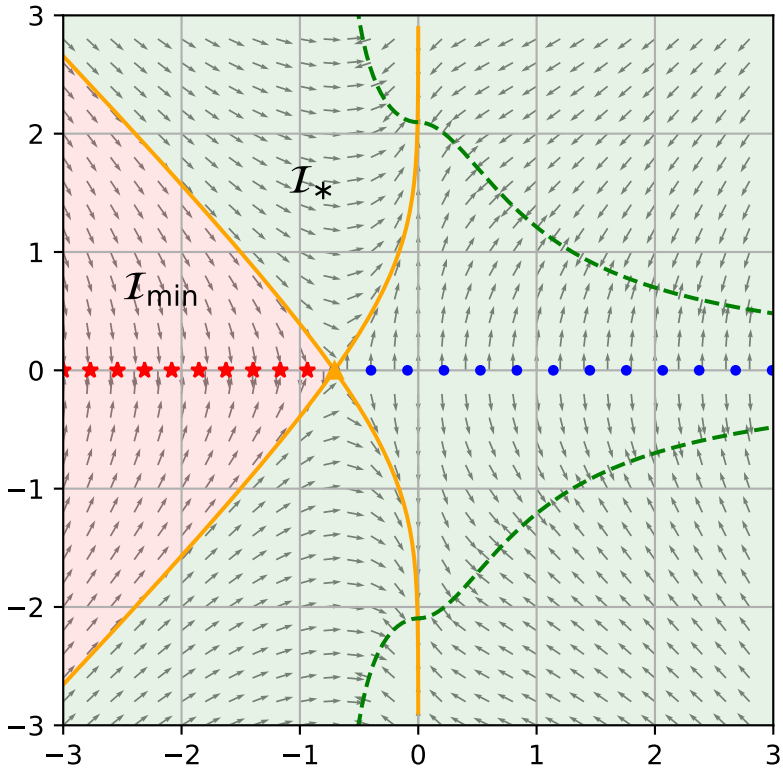

Supplement: supplementary_material [file attachment]

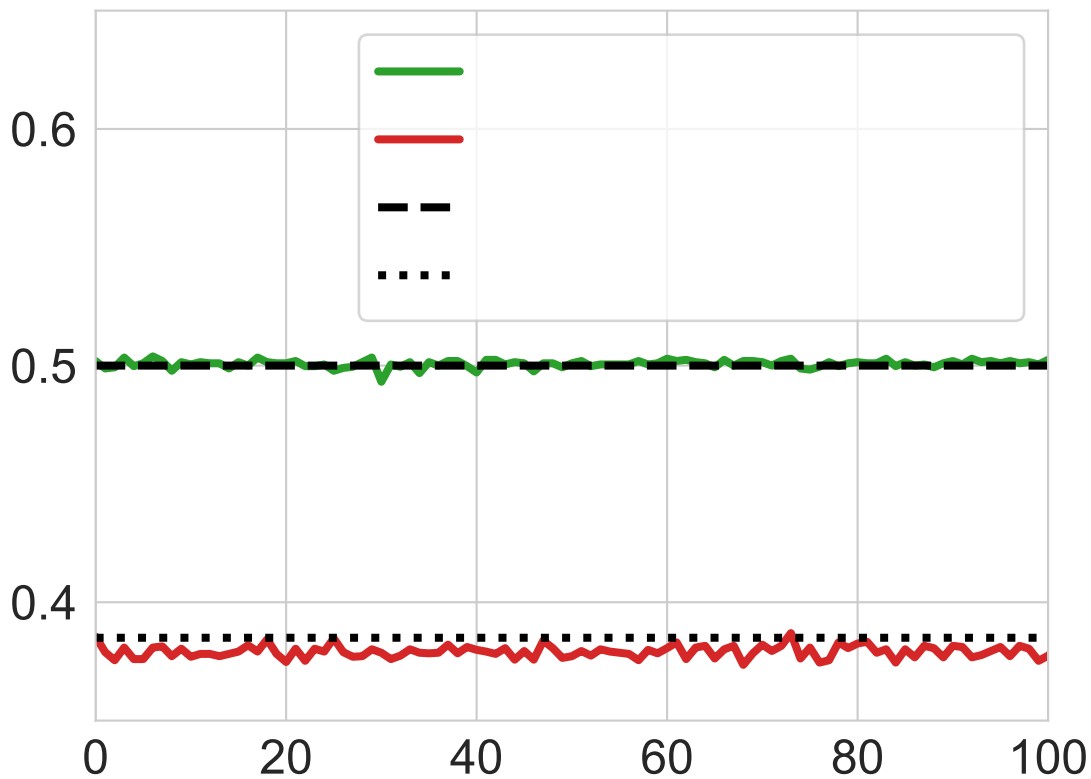

Supplement: supplementary_material [file attachment]

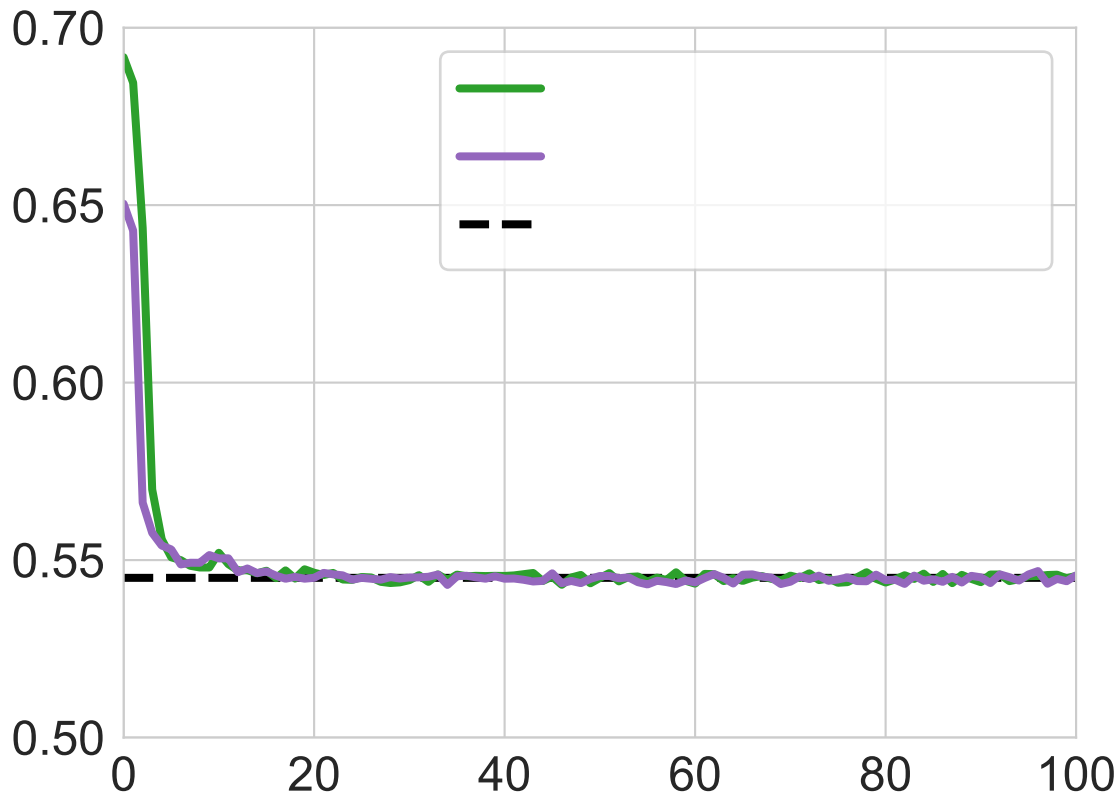

Supplement: supplementary_material [file attachment]

-0.10   -0.05   0.00   0.05   0.10

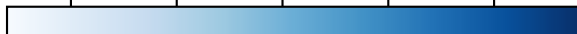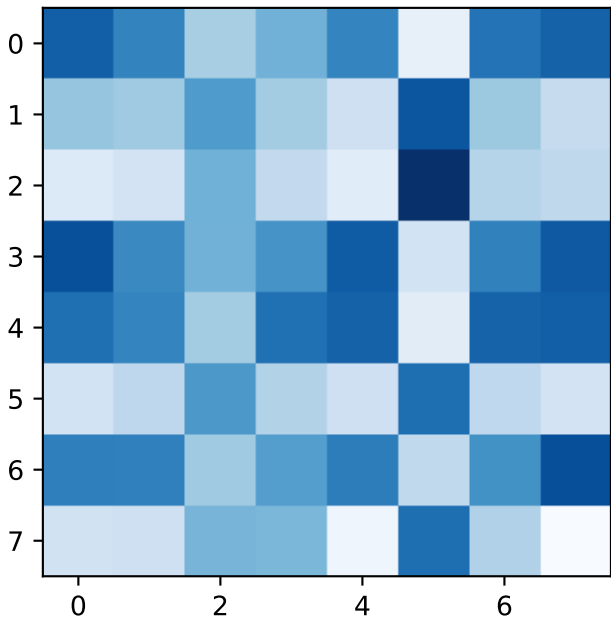

Supplement: supplementary_material [file attachment]

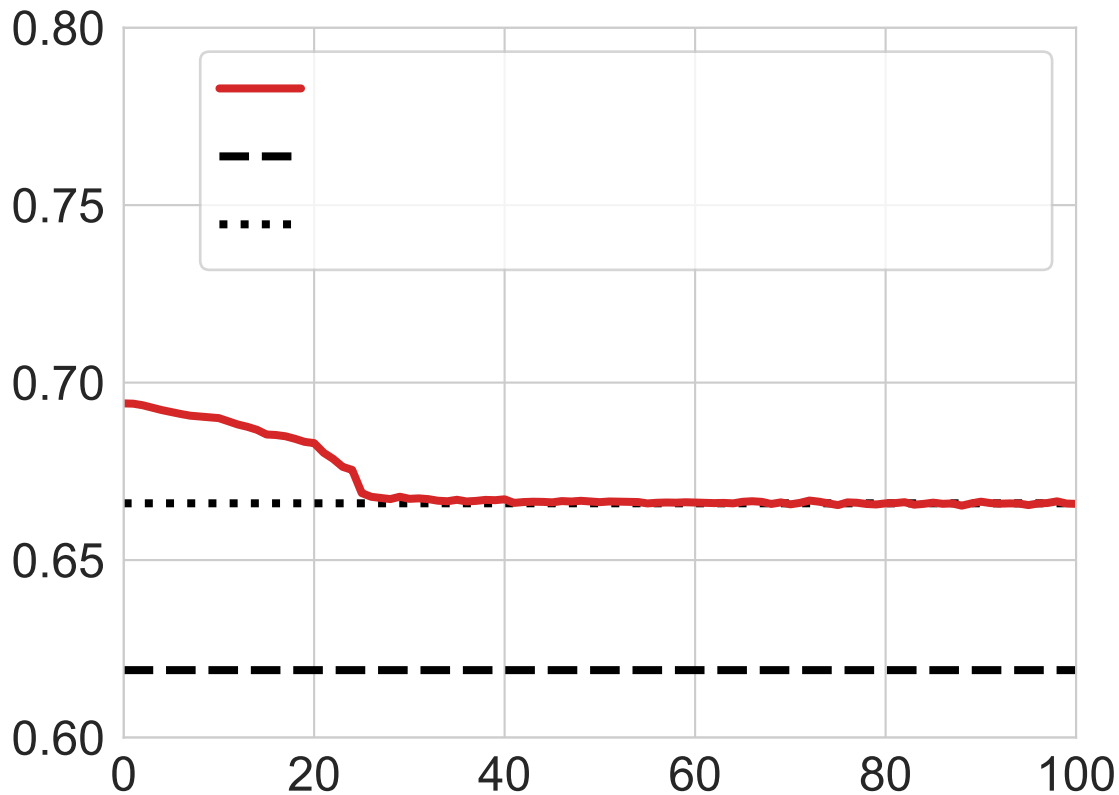

Supplement: supplementary_material [file attachment]

-0.1

0.0

0.1

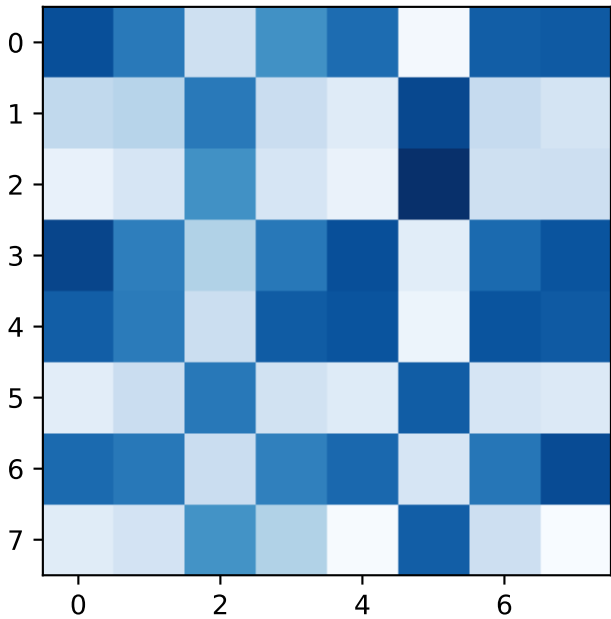

Supplement: supplementary_material [file attachment]
